# Supplementary material for: Reiterative Enrichment and Authentication of CRISPRi Targets (REACT) identifies the proteasome as a key contributor to HIV-1 latency
Source: PubMed Central journal article supplement (PMC6333332; doi:10.1371/journal.ppat.1007498), 2019-01-15

**A**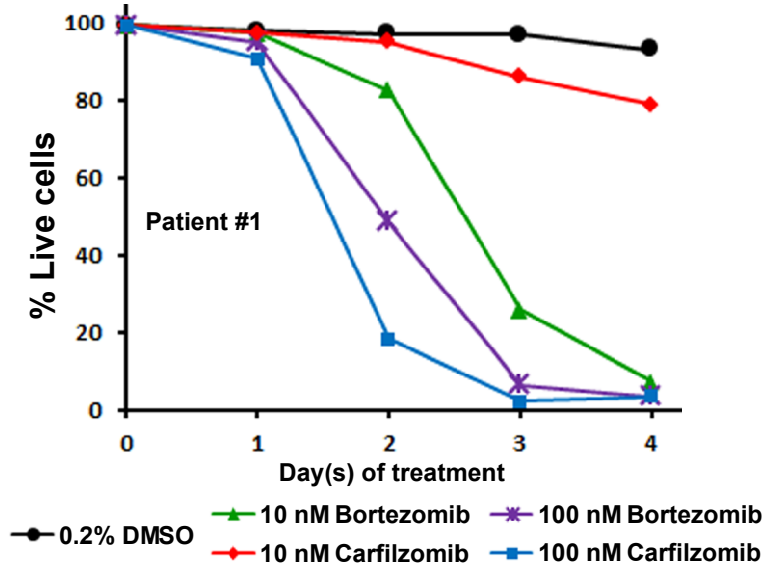**B**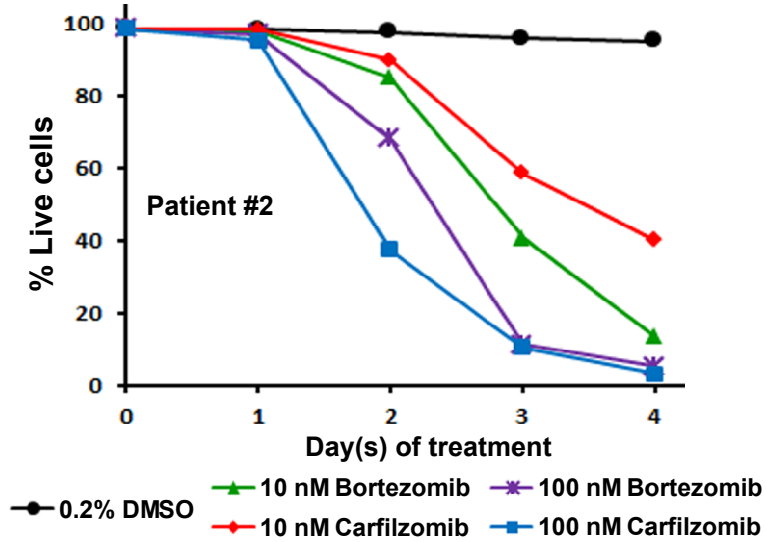**C**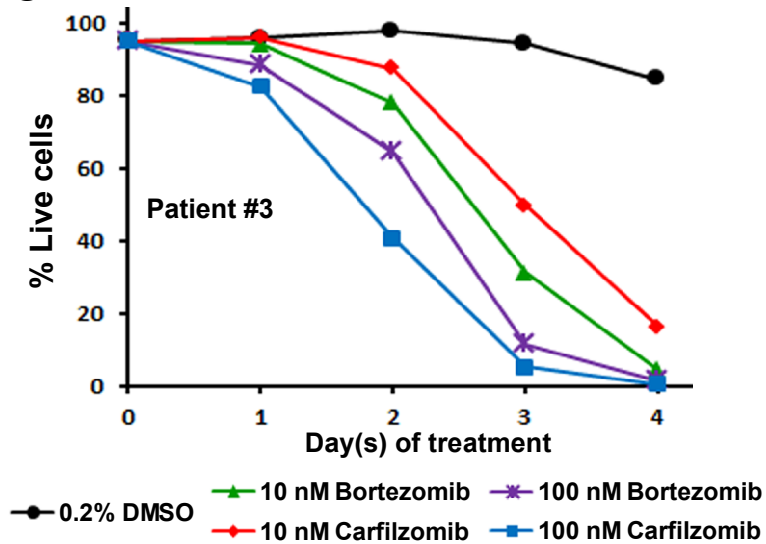

Supplement: ppat.1007498.s007.pdf [file ppat.1007498.s007.pdf]
