# Supplementary material for: Reiterative Enrichment and Authentication of CRISPRi Targets (REACT) identifies the proteasome as a key contributor to HIV-1 latency
Source: PubMed Central journal article supplement (PMC6333332; doi:10.1371/journal.ppat.1007498), 2019-01-15
Supplement: ppat.1007498.s009.pdf [file ppat.1007498.s009.pdf]

**Supplemental Table 1. Characteristics of HIV-1–infected study participants**

| Patient ID | Age (years) | Gender | Ethnicity              | Duration of infection (years) | ART regimen           | Time on ART (years) | Time on suppressive ART (years) | CD4 count (cells/mm <sup>3</sup> ) | CD8 count (cells/mm <sup>3</sup> ) | Viral load (copies/ml) | Peak viral load (copies/ml) | CD4_Nadir (cells/mm <sup>3</sup> ) |
|------------|-------------|--------|------------------------|-------------------------------|-----------------------|---------------------|---------------------------------|------------------------------------|------------------------------------|------------------------|-----------------------------|------------------------------------|
| 1          | 72          | Male   | White                  | 23                            | TCV, FTC/TAF          | 12                  | 10                              | 725                                | 1024                               | <40                    | 28699                       | 223                                |
| 2          | 62          | Male   | Hispanic/Latino        | 25                            | ABC/TCV/3TC           | 16.4                | 10.9                            | 606                                | 407                                | <40                    | 119870                      | 4                                  |
| 3          | 58          | Male   | Black/African American | 37                            | ABC/TCV/3TC           | 18.4                | 16.6                            | 235                                | 729                                | <40                    | unknown                     | 185                                |
| 4          | 50          | Male   | White                  | 17                            | TCV/RPV               | 13                  | 12                              | 380                                | 304                                | <40                    | 495912                      | 129                                |
| 5          | 66          | Male   | White                  | 34                            | TCV, FTC/TAF          | 19                  | 19                              | 489                                | 619                                | <40                    | unknown                     | 40                                 |
| 6          | 67          | Male   | White                  | 18                            | ABC/TCV/3TC           | 12                  | 11                              | 522                                | 544                                | <40                    | 376658                      | 378                                |
| 7          | 57          | Male   | White                  | 31                            | RTV, DRV, ABC/TCV/3TC | 20                  | 11                              | 615                                | 804                                | <40                    | 171000                      | 147                                |
| 8          | 57          | Male   | Black/African American | 21                            | EFV/TDF/FTC           | 10                  | 9                               | 466                                | 555                                | <40                    | 150000                      | 211                                |
| 9          | 60          | Male   | Black/African American | 13                            | EFV/TDF/FTC           | 11                  | 10                              | 687                                | 237                                | <40                    | 312938                      | 153                                |
| 10         | 34          | Male   | White                  | 7                             | EVG/TDF/FTC/COBI      | 7                   | 7                               | 293                                | 642                                | <40                    | 694195                      | 50                                 |
| 11         | 49          | Male   | Black/African American | 13                            | FTC/TDF, RTV, DRV     | 8                   | 8                               | 639                                | 921                                | <40                    | 286924                      | 208                                |
| 12         | 47          | Male   | Hispanic/Latino        | 25                            | ABC/TCV/3TC, ATV      | 14                  | 10                              | 351                                | 466                                | <40                    | 357000                      | 56                                 |
| 13         | 70          | Male   | White                  | 33                            | DRV, RTV, TCV, 3TC    | 24                  | 7                               | 836                                | 889                                | <40                    | 80410                       | 98                                 |

3TC, lamivudine (Epivir); ABC, abacavir (Ziagen); ATV, atazanavir (Reyataz); COBI, cobicistat; DRV, darunavir (Prezista); EFV, efavirenz (Sustiva, Stocrin); EVG, elvitegravir; FTC, emtricitabine (Emtriva); RPV, rilpivirine (Edurant); RTV, ritonavir (Norvir); TAF, tenofovir alafenamide; TCV, dolutegravir (Tivicay); TDF, tenofovir (Viread).
