# Supplementary material for: Reiterative Enrichment and Authentication of CRISPRi Targets (REACT) identifies the proteasome as a key contributor to HIV-1 latency
Source: PubMed Central journal article supplement (PMC6333332; doi:10.1371/journal.ppat.1007498), 2019-01-15
Supplement: ppat.1007498.s010.pdf [file ppat.1007498.s010.pdf]

**Supplemental Table 2. List of DNA oligonucleotide primers used in this study**

| Primer               | Sequence (5' → 3')                                                                     |
|----------------------|----------------------------------------------------------------------------------------|
| For deep-sequencing: |                                                                                        |
| CRISPRi_TSS_12_P5    | AATGATACGGCGACCACCGAGATCTACACTTGTAGGAAGAGCACACGTCTGAACTCCAGTCACGCACAAAAGGAAACTCACCCCT  |
| CRISPRi_TSS_12_P7    | CAAGCAGAAGACGGCATAACGAGATCTTGTAGTGACTGGAGTTCAGACGTGTGCTCTTCCGATCACGACTCGGTGCCACTTTTTTC |
| CRISPRi_TSS_6_P5     | AATGATACGGCGACCACCGAGATCTACAGCCAATGGAAGAGCACACGTCTGAACTCCAGTCACGCACAAAAGGAAACTCACCCCT  |
| CRISPRi_TSS_6_P7     | CAAGCAGAAGACGGCATAACGAGATGCCAATGTGACTGGAGTTCAGACGTGTGCTCTTCCGATCACGACTCGGTGCCACTTTTTTC |
| CRISPRi TSS_seq V2   | GTGTGTTTTGAGACTATAAGTATCCCTTGGAGAACCACCTTGTGG                                          |
| For qPCR:            |                                                                                        |
| qActB-F              | AGAGCTACGAGCTGCCTGAC                                                                   |
| qActB-R              | AGCACTGTGTTGGCGTACAG                                                                   |
| qGAPDH-F             | AATCCCATCACCATCTTCCAG                                                                  |
| qGAPDH-R             | AAATGAGCCCCAGCCTTC                                                                     |
| qEnv-F               | GAGACAGAGACAGATCCATTCG                                                                 |
| qEnv-R               | CCAGAAGTTCCACAATCCTCG                                                                  |
| qGFP-F               | CAGTGCTTCAGCCGCTACCC                                                                   |
| qGFP-R               | AGTTCACCTTGATGCCGTTCTT                                                                 |
| qPSMD1-F             | CTGAGCTGACAGATACTACTGC                                                                 |
| qPSMD1-R             | GTGCAAATTCCTTAAGCTGTGG                                                                 |
| qPSMD3-F             | CGCCTCAACCACTATGTTCTG                                                                  |
| qPSMD3-R             | AATCAGCCTCTGTGTCCATG                                                                   |
| qPSMD8-F             | GAACCGTAAAAGCCCCAATC                                                                   |
| qPSMD8-R             | CCCGATCTCCAGTATGTCAC                                                                   |
| qGON4L-F             | GAAGTCAAGGAAGAAGGAGGG                                                                  |
| qGON4L-R             | AGGAGAGGCACAAACATCTG                                                                   |
| qCYLD-F              | TGGGATGGAAGATTTGATGGAG                                                                 |

---

|           |                          |
|-----------|--------------------------|
| qCYLD-R   | CATAAAGGCAAGTTGGGAGG     |
| qNFKBIA-F | GTCTACACTTAGCCTCTATCCATG |
| qNFKBIA-R | AGGTCAGGATTTGCAGGTC      |
| qPSMA1-F  | GGTTGCATTGAAAAGGGCG      |
| qPSMA1-R  | ATCCAAACACTCCTGACGC      |
| qPSMB1-F  | GCTGCAATGCTGTCTACAATC    |
| qPSMB1-R  | TCTCTGGTAAGACCCTACTGG    |
| qELL1-F   | CCTTCTACCTCTCCAACATCG    |
| qELL1-R   | ACCGTGATCTTGTCTGTATG     |
| qELL2-F   | GAGACTTACCAGAGCCACAAG    |
| qELL2-R   | TTGTCTTTGCCACATTTGAC     |

---
