# Supplementary material for: Reiterative Enrichment and Authentication of CRISPRi Targets (REACT) identifies the proteasome as a key contributor to HIV-1 latency
Source: PubMed Central journal article supplement (PMC6333332; doi:10.1371/journal.ppat.1007498), 2019-01-15
Supplement: ppat.1007498.s011.pdf [file ppat.1007498.s011.pdf]

**Supplemental Table 3. List of antibodies used in this study**

| Antibody                               | Source               |
|----------------------------------------|----------------------|
| rabbit anti-human ELL2                 | Bethyl A302–505A     |
| rabbit anti-human ELL1                 | Bethyl A301–645A     |
| rabbit anti-human ENL                  | Bethyl A302-268A     |
| mouse anti-human AFF4                  | Abcam ab57077        |
| rabbit anti-human AFF1                 | Bethyl A302–344A     |
| rabbit anti-human CycT1                | Santa Cruz sc-10750  |
| rabbit anti-human AF9                  | Bethyl A300-595A     |
| rabbit anti-human LARP7                | (He et al., 2008)    |
| mouse anti-human I $\kappa$ B $\alpha$ | Santa Cruz sc-1643   |
| rabbit anti-human PSMD1                | Bethyl A303-852A     |
| rabbit anti-human PSMD3                | Bethyl A303-826A     |
| mouse anti-human PSMD8                 | Santa Cruz sc-514053 |
| rabbit anti-human PSMA1                | Bethyl A303-845A     |
| rabbit anti-human PSMB1                | Abcam ab135830       |
| rabbit anti-human Brd4                 | (Yang et al., 2005)  |
| rabbit anti-human CDK9                 | (He et al., 2010)    |
| goat anti-mouse-680 nm                 | Invitrogen A-21057   |
| goat anti-rabbit-680 nm                | Invitrogen A-21076   |

## References

He, N., Jahchan, N.S., Hong, E., Li, Q., Bayfield, M.A., Maraia, R.J., Luo, K., and Zhou, Q. (2008). A La-related protein modulates 7SK snRNP integrity to suppress P-TEFb-dependent transcriptional elongation and tumorigenesis. *Mol Cell* 29, 588-599.

He, N., Liu, M., Hsu, J., Xue, Y., Chou, S., Burlingame, A., Krogan, N.J., Alber, T., and Zhou, Q. (2010). HIV-1 Tat and host AFF4 recruit two transcription elongation factors into a bifunctional complex for coordinated activation of HIV-1 transcription. *Mol Cell* 38, 428-438.

Yang, Z., Yik, J.H., Chen, R., He, N., Jang, M.K., Ozato, K., and Zhou, Q. (2005). Recruitment of P-TEFb for stimulation of transcriptional elongation by the bromodomain protein Brd4. *Mol Cell* 19, 535-545.
